# Supplementary material
Source: PubMed Central journal article supplement (PMC11477832)
Supplement: ajcr0014-4286-f10.pdf [file ajcr0014-4286-f10.pdf]

## BARGs as a diagnostic marker of ccRCC

**Supplementary Table 1.** The brown adipocytes-related genes list

---

Brown adipocytes-related genes list

---

CPM  
SFN  
INS  
SLIT3  
PCDHB12  
ACTB  
ACTA1  
GRN  
CTSZ  
PI3  
MGP  
CFL2  
ELN  
HBB  
HBD  
TIMP4  
SERPINB4  
ITM2B  
ORM1  
DEFA3  
DEFA1  
CD59  
PPP1R1A  
C6  
CTSC  
LRRN4CL  
LAMP1  
CES1  
SCGB1D2  
RNASE7  
DAG1  
FAU  
LTBP1  
SRGN  
ENO3  
FBN2  
IDE  
ERP29  
APOC1  
AOC3  
SDCBP  
CLSTN1  
FKBP2  
SPARCL1  
RCN3  
PRDX4  
HEBP1

## BARGs as a diagnostic marker of ccRCC

DHRS11  
CALU  
GM2A  
C4A  
C4B  
SFRP1  
ORM2  
PTPRG  
DNASE2  
C1QTNF1  
SLURP1  
TTR  
OMD  
SERPINB5  
IL1RN  
IL36G  
CHI3L1  
ENPP2  
PODN  
OAF  
LAMB2  
SUMF2  
EFNB1  
TUBA4A  
CNPY2  
MCFD2  
EPDR1  
TTN  
STATH  
TFPI  
TIMM8B  
ERP44  
KLK7  
GBP2  
SBSN  
ERAP1  
PSAPL1  
GNB2  
A2ML1  
GLB1  
VIT  
SRPX2  
TGOLN2  
CXCL12  
DPYSL3  
SERPINB2  
ANG  
ABI3BP  
TFRC

## BARGs as a diagnostic marker of ccRCC

LCN2  
 RNASET2  
 PTPRM  
 C1RL  
 FKBP7  
 LY6D

**Supplementary Table 2.** Univariate cox regression screened the prognostic-related BARGs

| BASGs   | HR       | HR.95L   | HR.95H   | uniCOX ( <i>p</i> ) | K-M ( <i>p</i> ) |
|---------|----------|----------|----------|---------------------|------------------|
| ORM1    | 1.018018 | 1.010836 | 1.025252 | 7.68E-07            | 0.004            |
| RCN3    | 1.001872 | 1.001087 | 1.002657 | 2.89E-06            | 4.10E-05         |
| PTPRM   | 0.989829 | 0.985257 | 0.994422 | 1.50E-05            | 9.08E-07         |
| ORM2    | 1.032442 | 1.016679 | 1.048448 | 4.76E-05            | 2.69E-06         |
| C1QTNF1 | 1.004283 | 1.002061 | 1.006509 | 1.55E-04            | 2.71E-05         |
| SPARCL1 | 0.999195 | 0.998755 | 0.999635 | 3.37E-04            | 1.78E-05         |
| PPP1R1A | 1.002924 | 1.001302 | 1.004548 | 4.06E-04            | 2.93E-09         |
| DPYSL3  | 1.002192 | 1.000975 | 1.003412 | 4.15E-04            | 1.18E-06         |
| ANG     | 0.981099 | 0.969521 | 0.992815 | 0.002               | 1.14E-04         |
| RNASET2 | 1.007002 | 1.002211 | 1.011816 | 0.004               | 9.84E-06         |
| ENPP2   | 0.999006 | 0.998283 | 0.999729 | 0.007               | 1.38E-05         |
| SCGB1D2 | 0.974614 | 0.956549 | 0.993019 | 0.007               | 2.37E-07         |
| CTSZ    | 1.000634 | 1.000118 | 1.00115  | 0.016               | 1.38E-04         |
| GM2A    | 0.995904 | 0.992407 | 0.999414 | 0.022               | 4.07E-06         |
| PCDHB12 | 0.934664 | 0.872721 | 1.001004 | 0.053               | 0.008            |
| APOC1   | 1.001039 | 0.999968 | 1.002112 | 0.057               | 0.007            |
| CXCL12  | 0.997296 | 0.994015 | 1.000588 | 0.107               | 3.12E-04         |
| DAG1    | 0.99431  | 0.987255 | 1.001415 | 0.116               | 0.003            |
| GBP2    | 1.002158 | 0.99922  | 1.005105 | 0.150               | 0.017            |

# BARGs as a diagnostic marker of ccRCC

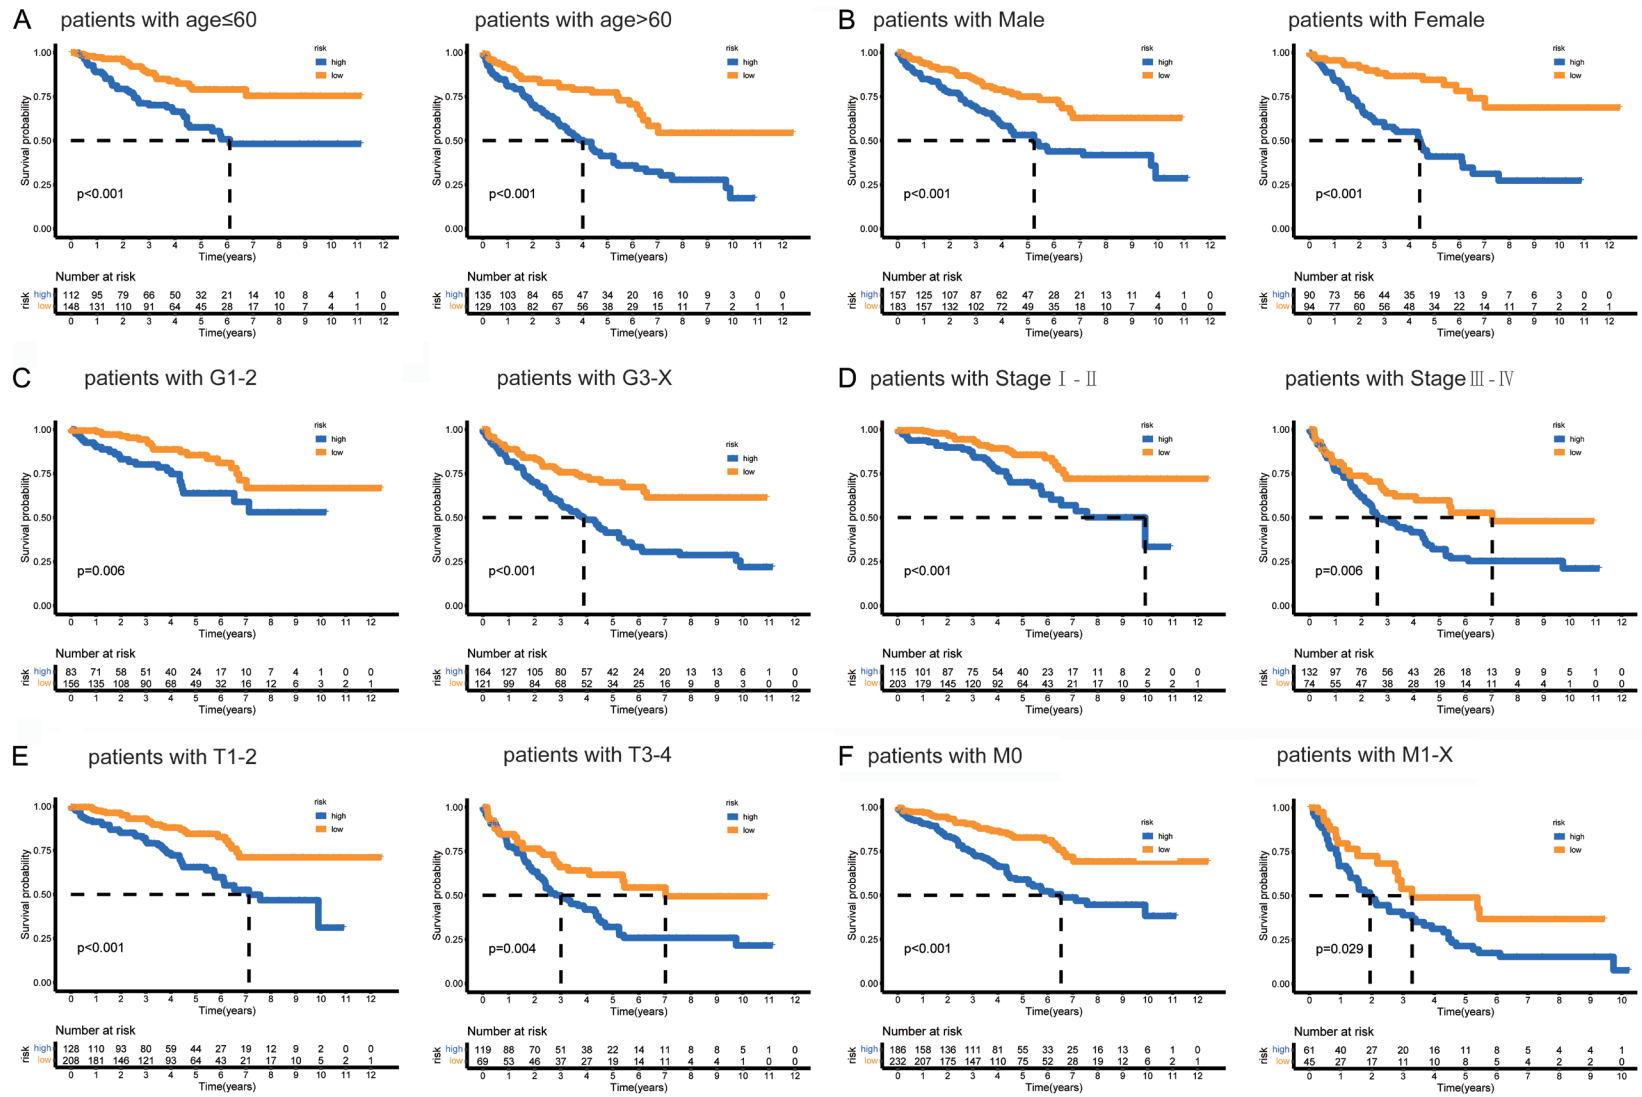

BARGs as a diagnostic marker of ccRCC

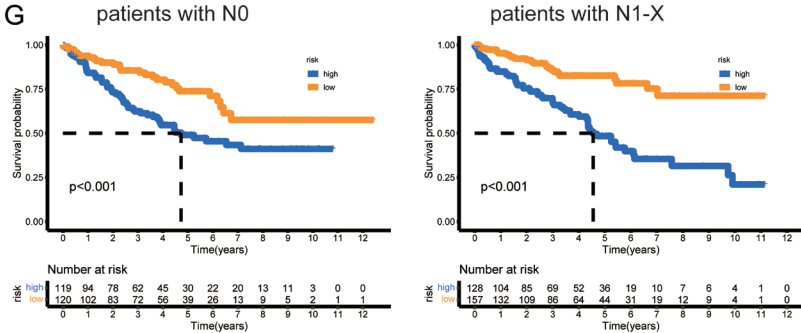

**Supplementary Figure 1.** K-M survival analysis of the risk signature in ccRCC patients stratified by different clinical parameters in TCGA dataset. (A) Age, (B) gender, (C) grade, (D) stage, and (E) T, (F) M, (G) N staging.
